# Supplementary material for: Toxicity of Zn-Fe Layered Double Hydroxide to Different Organisms in the Aquatic Environment
Source: PubMed Central journal article supplement (PMC7828569; doi:10.3390/molecules26020395), 2021-01-13
Supplement: molecules-26-00395-s001.pdf [file molecules-26-00395-s001.pdf]

# Toxicity of Zn-Fe Layered Double Hydroxide to Different Organisms in the Aquatic Environment

Olga Koba-Ucun <sup>1</sup>, Tuğba Ölmez Hanci <sup>1</sup>, Idil Arslan-Alaton <sup>1,\*</sup>, Samira Arefi-Oskoui <sup>2</sup>, Alireza Khataee <sup>2,3,\*</sup>, Mehmet Kobyas <sup>3,4</sup> and Yasin Orooji <sup>5</sup>

<sup>1</sup> School of Civil Engineering, Department of Environmental Engineering, Istanbul Technical University, 34469 Maslak, Istanbul, Turkey; kobaucun@itu.edu.tr (O.K.-U.); tolmez@itu.edu.tr (T.Ö.H.)

<sup>2</sup> Research Laboratory of Advanced Water and Wastewater Treatment Processes, Department of Applied Chemistry, Faculty of Chemistry, University of Tabriz, 51666-16471 Tabriz, Iran; s.arefi@tabrizu.ac.ir

<sup>3</sup> Department of Environmental Engineering, Gebze Technical University, 41400 Kocaeli, Turkey; kobyas@gtu.edu.tr

<sup>4</sup> Department of Environmental Engineering, Kyrgyz-Turkish Manas University, 720038 Bishkek, Kyrgyzstan

<sup>5</sup> College of Materials Science and Engineering, Nanjing Forestry University, Nanjing 210037, China; yasin@njfu.edu.cn

\* Correspondence: arslanid@itu.edu.tr (I.A.-A.); akhataee@gtu.edu.tr (A.K.)

**Table S1.** Summary of toxicity test procedures used in this study.

| Test Organism         | Taxonomy/<br>Trophic Level    | Concentration<br>Range (g/L) | Exposure<br>Time | EC <sub>50</sub> (g/L)                           | Toxicity Endpoint          | Test Protocol |
|-----------------------|-------------------------------|------------------------------|------------------|--------------------------------------------------|----------------------------|---------------|
| <i>V. fischeri</i>    | Photobacteria/<br>decomposer  | 0.05-2.00                    | 15 min           | 0.31±0.03 <sup>a</sup><br>1.20±0.12 <sup>b</sup> | Bioluminescence inhibition | ISO 11348-3   |
|                       |                               |                              | 30 min           | 0.11±0.01 <sup>a</sup><br>0.32±0.03 <sup>b</sup> |                            |               |
| <i>P. subcapitata</i> | Freshwater algae/<br>producer | 0.10-2.00                    | 72 h             | < 0.1 <sup>c</sup>                               | Growth inhibition          | ISO 8692      |
| <i>D. magna</i>       | Cladoceran/<br>consumer       | 0.05-2.00                    | 24 h             | 0.17±0.02                                        | Death or immobilization    | OECD 202      |
|                       |                               |                              | 48 h             | 0.10±0.01                                        |                            |               |
| <i>S. polyrhiza</i>   | Aquatic plant/<br>producer    | 0.075-2.00                   | 72 h             | 0.81±0.19                                        | Growth inhibition          | ISO 20227     |

<sup>a</sup>Preparation time for the catalyst was 1 h; <sup>b</sup>Preparation time for the catalyst was 3 h; <sup>c</sup>Complete inhibition was observed at all tested catalyst concentrations.

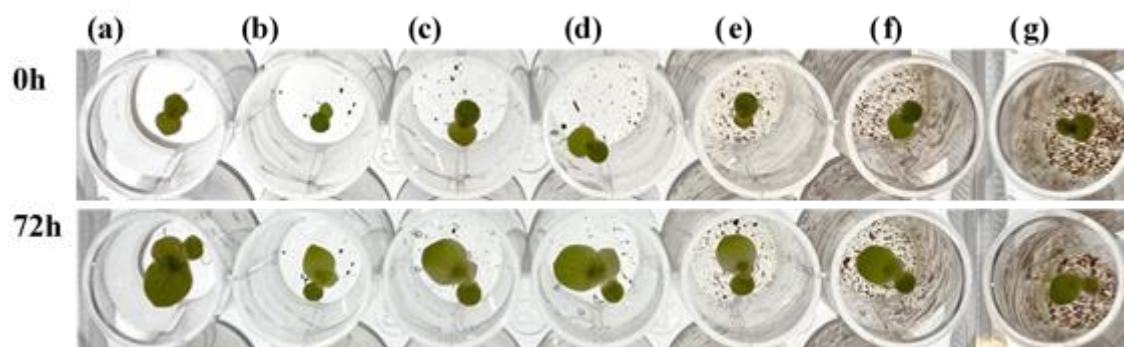

**Figure 1.** Changes in the fronds of *S. polyrhiza* exposed to the different concentrations of Zn-Fe LDH. The figure shows fronds for test control (a), 0.05 g/L (b), 0.075 g/L (c), 0.10 g/L (d), 0.50 g/L (e), 1.00 g/L (f), and 2.00 g/L (g) Zn-Fe LDH exposure.
